# Supplementary material
Source: PubMed Central journal article supplement (PMC8084869)
Supplement: NIHMS1645039-supplement-1.pdf [file NIHMS1645039-supplement-1.pdf]

1  
2  
3  
4  
5  
6  
7  
8  
9  
10  
11  
12  
13  
14  
15  
16  
17  
18  
19  
20  
21  
22

**Supplementary Information for**

**NLRP6 Modulates Neutrophil Homeostasis in Bacterial Pneumonia-Derived Sepsis**

*Cai et al.,*

Corresponding author: Samithamby Jeyaseelan ([jey@lsu.edu](mailto:jey@lsu.edu))

23  
 24  
 25  
 26  
 27  
 28  
 29  
 30  
 31  
 32  
 33  
 34  
 35  
 36  
 37  
 38  
 39  
 40  
 41  
 42  
 43  
 44  
 45

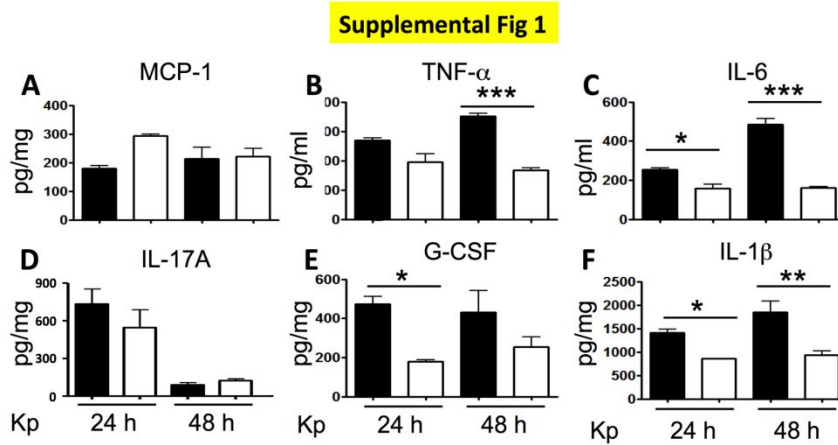

**Supplemental Figure 1. NLRP6 regulates the production of cytokines/chemokines in Kp-pneumonia-induced sepsis.** (A-F) *Nlrp6*<sup>-/-</sup> and WT mice were infected with Kp ( $10^3$  CFUs/mouse) and BALF and lungs were harvested at 24 and 48 h post-infection. Levels of MCP1 (A), TNF- $\alpha$  (B), IL-6 (C), IL-17A (D), G-CSF (E), and IL-1 $\beta$  (F) in BALF or lung homogenates were measured. ( $n = 4-6$  mice/infection group,  $n = 3$  mice/control group) Statistical significance was determined by unpaired *t*-test. \*,  $p < 0.05$ ; \*\*,  $p < 0.01$ ; \*\*\*,  $p < 0.001$ . Error bars represent SEM.

46

47

48

49

50

51

52

53 **Supplemental Figure 2. Level of CXCL1 in Kp-infected *Nlrp6*<sup>-/-</sup> and WT mice. (A-B) *Nlrp6*<sup>-/-</sup>**54 **<sup>-/-</sup> and WT mice were infected with Kp (10<sup>3</sup> CFUs/mouse). CXCL1 were measured in serum and**55 **lung homogenates. (*n* = 4–6 mice/infection group, *n* = 3 mice/control group) Statistical**56 **significance was determined by unpaired *t*-test. \*\*, *p* < 0.01. Error bars represent SEM.**

57

58

59

**Supplemental Fig 3**

60

61

62

63

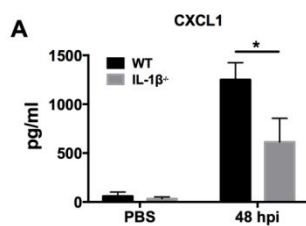64 **Supplemental Figure 3. Abundance of CXCL1 in Kp-infected *IL-1β*<sup>-/-</sup> and WT mice. (A) *IL-***65 ***1β*<sup>-/-</sup> and WT mice were infected with Kp (10<sup>3</sup> CFUs/mouse) and CXCL1 were measured in the**66 **BALF. (*n* = 4–6 mice/infection group, *n* = 3 mice/control group) Statistical significance obtained**67 **by unpaired *t*-test. \*, *p* < 0.05. Error bars represent SEM.**

68

69

70

71

72

73

Supplemental Fig 4

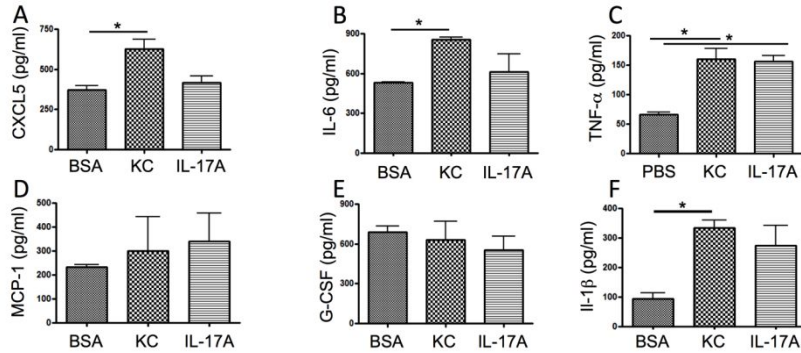74 **Supplemental Figure 4. Production of cytokines/chemokines in Kp-pneumonia-induced**75 **sepsis in mice receiving rIL-17A or rCXCL1. (A-F) *Nlrp6*<sup>-/-</sup> mice were infected with Kp (10<sup>3</sup>**76 **CFU/mouse) with or without administration of rCXCL1 or rIL-17A or BSA at the time of**77 **infection. Levels of CXCL5 (A), IL-6 (B), TNF- $\alpha$  (C), MCP-1 (D), G-CSF (E), and IL-1 $\beta$  (F) in**78 **BALF were measured. (*n* = 4–6 mice/group) Statistical significance was determined by ANOVA**79 **(followed by Tukey's multiple comparison). \*, *p* < 0.05. Error bars represent SEM.**

80

81

82

83

84
